# Supplementary material
Source: HighWire-hosted journal article supplement (https://erj.ersjournals.com/content/58/1/2001798)
Supplement: inline-supplementary-material-2 [file inline-supplementary-material-2.pdf]

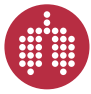

# Can simvastatin reduce COPD exacerbations? A randomised double-blind controlled study

SHAREABLE PDF

Peter Schenk<sup>1</sup>, Alexander O. Spiel<sup>2,3</sup>, Felix Hüttinger<sup>1</sup>, Micheline Gmeiner<sup>1</sup>, Josefine Fugger<sup>4</sup>, Martina Pichler<sup>1</sup>, Gernot Pichler<sup>1</sup>, Susanne Schmeikal<sup>5</sup>, Wolfgang Janistyn<sup>6</sup>, Stefan Schügerl<sup>7</sup>, Constantin Sajdik<sup>1</sup> and Harald Herkner<sup>2</sup>

<sup>1</sup>Landeskrankenhaus Hohegg, Pulmologische Abteilung, Grimmenstein, Austria. <sup>2</sup>Medical University Vienna, Dept of Emergency Medicine, Vienna, Austria. <sup>3</sup>Central Emergency Dept, Ottakring Clinic, Vienna, Austria. <sup>4</sup>Landeskrankenhaus Mödling, Pharmacy, Mödling, Austria. <sup>5</sup>Baden, Austria. <sup>6</sup>Wr. Neustadt, Austria. <sup>7</sup>Neunkirchen, Austria.

Corresponding author: Peter Schenk ([peter.schenk@hohegg.lknoe.at](mailto:peter.schenk@hohegg.lknoe.at))

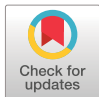

Shareable abstract (@ERSpublications)

**Acute exacerbations of COPD cause a lot of suffering and healthcare burden. In this study, *p.o.* simvastatin 40 mg·day<sup>-1</sup> reduced time to first exacerbation and exacerbation frequency in a double-blind, randomised controlled trial.** <https://bit.ly/3nHINet>

**Cite this article as:** Schenk P, Spiel AO, Hüttinger F, *et al.* Can simvastatin reduce COPD exacerbations? A randomised double-blind controlled study. *Eur Respir J* 2021; 58: 2001798 [DOI: 10.1183/13993003.01798-2020].

This single-page version can be shared freely online.

Copyright ©The authors 2021. For reproduction rights and permissions contact [permissions@ersnet.org](mailto:permissions@ersnet.org)

This article has supplementary material available from [erj.ersjournals.com](http://erj.ersjournals.com)

This article has an editorial commentary: <https://doi.org/10.1183/13993003.00342-2021>

Received: 14 May 2020  
Accepted: 16 Dec 2020

## Abstract

**Background** Several studies have shown that statins have beneficial effects in COPD regarding lung function decline, rates and severity of exacerbation, hospitalisation and need for mechanical ventilation.

**Methods** We performed a randomised double-blind placebo-controlled single-centre trial of simvastatin at a daily dose of 40 mg *versus* placebo in patients with Global Initiative for Chronic Obstructive Lung Disease criteria grades 2–4 at a tertiary care pulmonology department in Austria. Scheduled treatment duration was 12 months and the main outcome parameter was time to first exacerbation.

**Results** Overall, 209 patients were enrolled. In the 105 patients taking simvastatin, time to first exacerbation was significantly longer compared to the 104 patients taking placebo: median 341 *versus* 140 days (log-rank test  $p < 0.001$ ). Hazard ratio for risk of first exacerbation for the simvastatin group was 0.51 (95% CI 0.34–0.75;  $p = 0.001$ ). Rate of exacerbations was significantly lower with simvastatin: 103 (41%) *versus* 147 (59%) ( $p = 0.003$ ). The annualised exacerbation rate was 1.45 events per patient-year in the simvastatin group and 1.9 events per patient-year in the placebo group (incidence rate ratio 0.77, 95% CI 0.60–0.99). We found no effect on quality of life, lung function, 6-min walk test and high-sensitivity C-reactive protein. More patients dropped out in the simvastatin group compared to the placebo group (39 *versus* 29).

**Conclusion** In our single-centre RCT, simvastatin at a dose of 40 mg daily significantly prolonged time to first COPD exacerbation and reduced exacerbation rate.
